# Supplementary material for: The mediated rheological properties of emulsions stabilized by thread-like mesoporous silica nanoparticles in combination with CTAB
Source: Royal Society of Chemistry journal article supplement (doi:10.1039/d2sm01064j), 2022-01-01
Supplement: d2sm01064j1.pdf [file d2sm01064j1.pdf]

## Electronic Supporting Information

### Mediated rheological properties of emulsions stabilized by thread-like mesoporous silica nanoparticles in combination with CTAB

Danhua Xie, Yulong Jiang\*

Fujian Provincial Key Laboratory of Featured Biochemical and Chemical Materials, College of Chemistry and Materials, Ningde Normal University, Ningde 352100, Fujian, China.

\*Corresponding author. E-mail: [yulongjiang@ndnu.edu.cn](mailto:yulongjiang@ndnu.edu.cn)

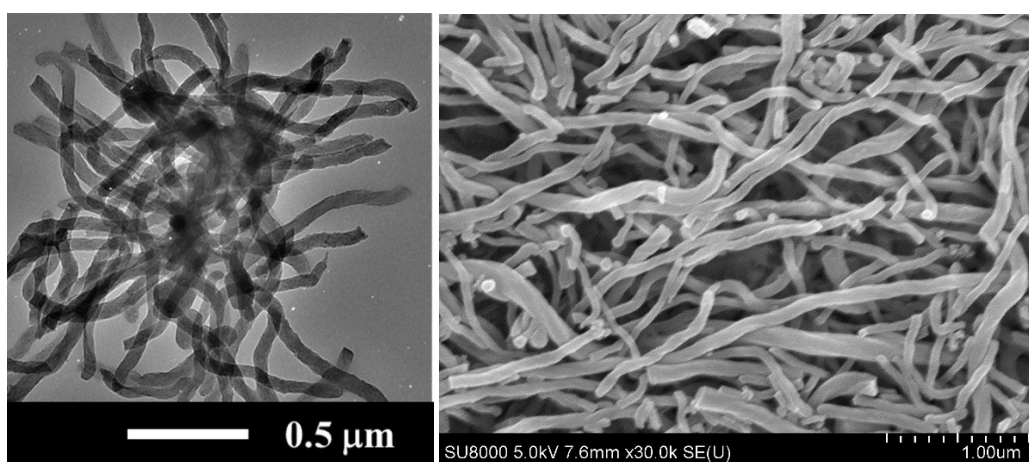

Fig. S1 TEM (left) and SEM (right) images of the TMSNPs.

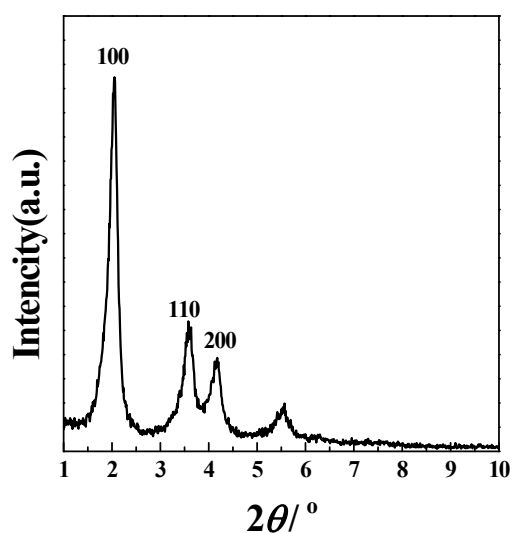

Fig. S2 Small-angle XRD pattern of the TMSNPs.

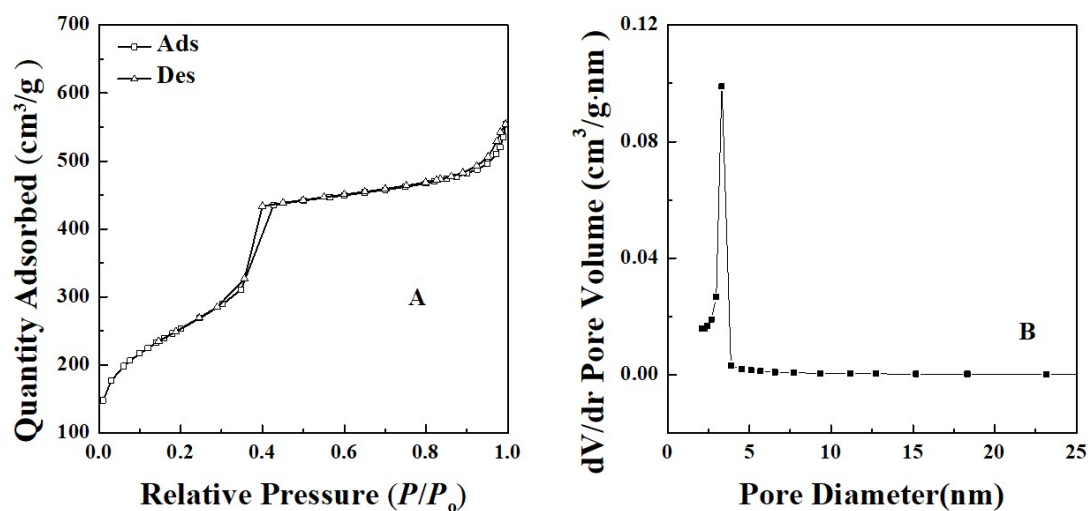

**Fig. S3** (A) N<sub>2</sub> adsorption–desorption isotherms and (B) Barrett–Joyner–Halenda pore size distribution of the TMSNPs.

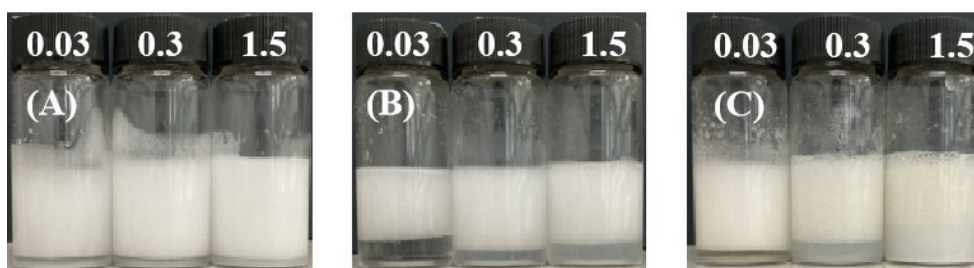

**Fig. S4** Digital photographs of Pickering emulsions prepared with (A) *n*-heptane, (B) ethylacetate and (C) olive oil as oil phase, stabilizing by the 1 wt % TMSNPs in combination with various concentration of CTAB (mmol·L<sup>-1</sup>) as indicated. The photographs were taken 1 h after emulsion preparation.

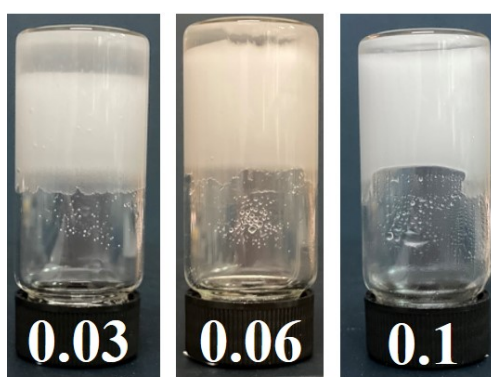

**Fig. S5** Digital photographs of emulsions stabilized by 1 wt % of the TMSNPs and various concentrations of CTAB (mmol·L<sup>-1</sup>) as indicated. The photographs were taken 1 h after emulsion preparation.

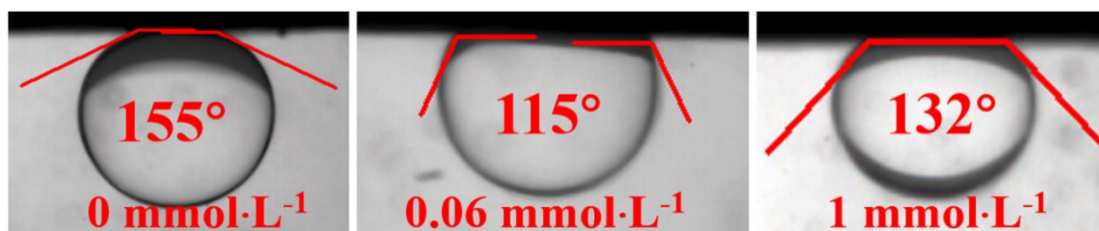

**Fig. S6** Photographs of the oil-in-water contact angle ( $\theta_{ow}$ ) measurements taken by attaching an *n*-octane drop to TMSNP tablets immersed in CTAB solutions of various concentrations as indicated.

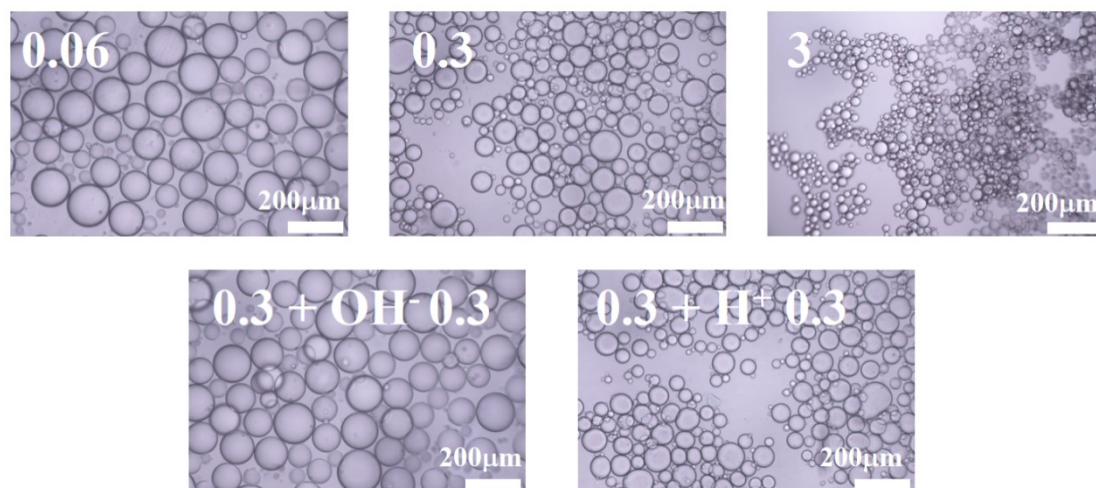

**Fig. S7** Optical microscopy images of emulsions stabilized by 1 wt % of the TMSNPs in combination with various concentrations of CTAB in the presence of NaOH or HCl as indicated (mmol·L<sup>-1</sup>).

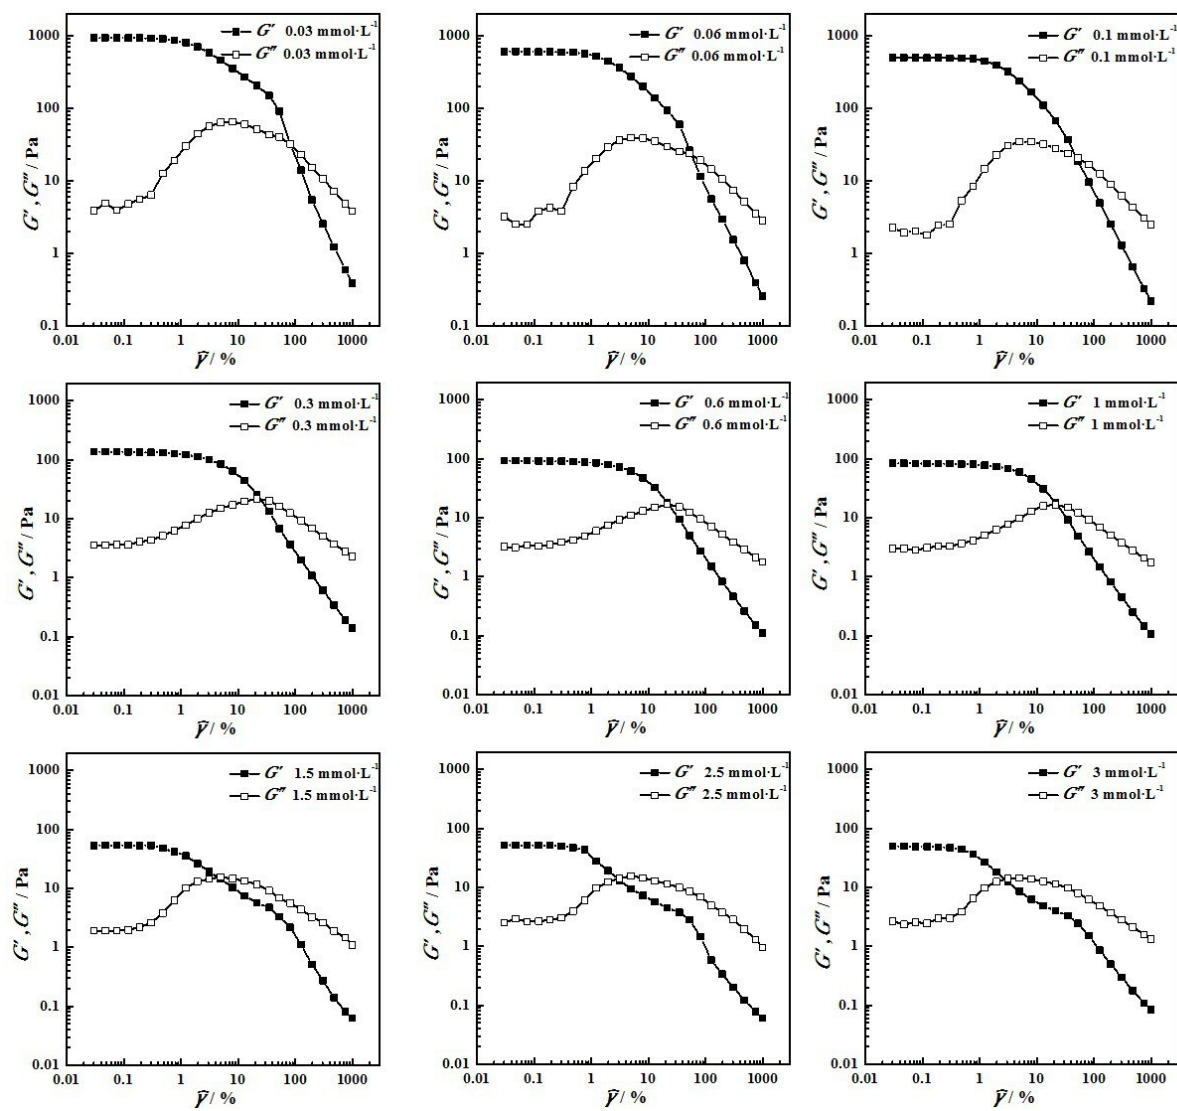

**Fig. S8** Strain sweep curves of emulsions stabilized by 1 wt % of the TMSNPs and various concentrations of CTAB as indicated.

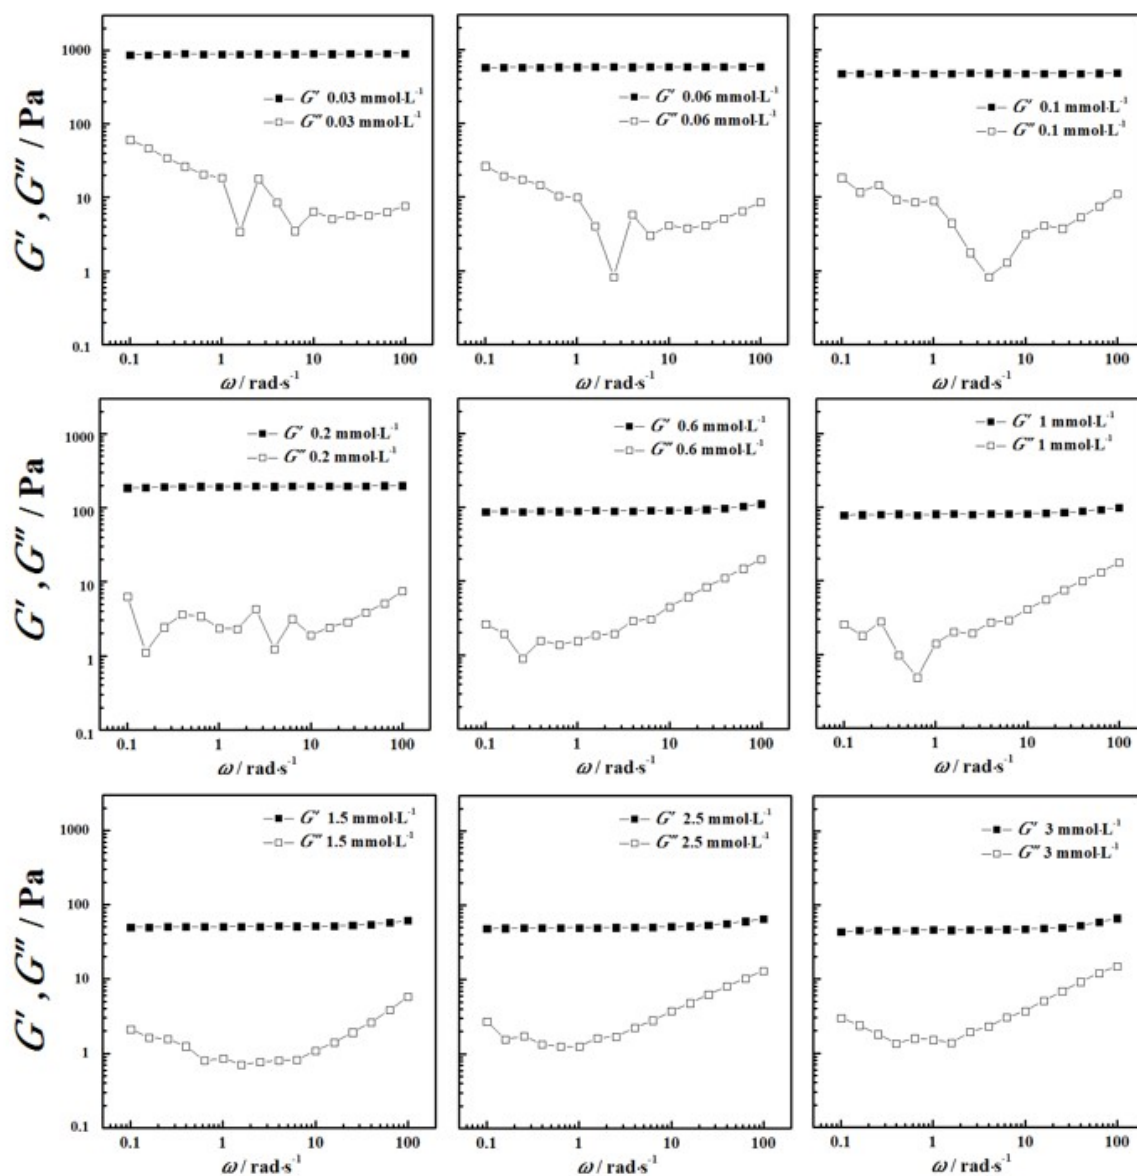

**Fig. S9** Frequency sweep curves of emulsions stabilized by 1 wt % of the TMSNPs and various concentrations of CTAB as indicated.

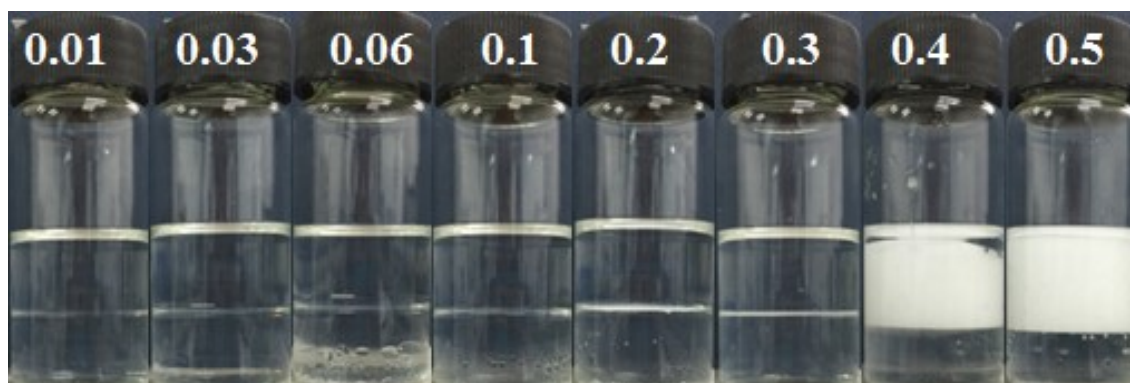

**Fig. S10** Digital photographs of emulsions stabilized by various concentrations of CTAB ( $\text{mmol}\cdot\text{L}^{-1}$ ) as indicated. The photographs were taken 1 h after emulsion preparation.

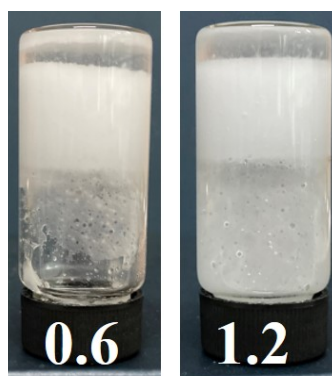

**Fig. S11** Digital photographs of emulsions stabilized by 1 wt % of the TMSNPs and  $0.3 \text{ mmol}\cdot\text{L}^{-1}$  of CTAB after the addition of various concentrations of NaOH ( $\text{mmol}\cdot\text{L}^{-1}$ ) as indicated. The photographs were taken 1 h after emulsion preparation.
